# Supplementary material
Source: PubMed Central journal article supplement (PMC8041462)
Supplement: kfab012_supplementary_data.pdf [file kfab012_supplementary_data.pdf]

Elucidation of the Effects of Bisphenol A and Structural Analogues on Germ and  
Steroidogenic Cells using Single Cell High-Content Imaging

Abishankari Rajkumar, Trang Luu, Marc A Beal, Tara S Barton-Maclaren, Bernard

Robaire and Barbara F Hales

**Supplementary Data Files**

1. Supplementary Methods: Imaging Acquisition and Processing

2. Supplementary Data

Table 1: Live-cell dyes used during high-content imaging analyses.

Table 2: High-Throughput Toxicokinetics modeling parameters

Fig 1: Chemical concentrations used for the analyses of phenotypic endpoints

Fig.2. BMC models (significant-upregulated: yellow box, down-regulated: purple box; non-significant-grey) generated to observe the effects of bisphenols on phenotypic endpoints.

Fig.3. Comparison of bisphenol analog cell viability data from the literature (circles) with the BMC values reported here for C18-4, MA-10 and KGN cells (triangles).

References for data presented in Supplementary Fig. 3

## 1. Supplementary Methods

### *Imaging Acquisition and Processing*

#### *Hoechst/Calcein/Lysotracker Red image processing*

Image segmentation to distinguish between different cells was done using the Hoechst channel where cells were identified using their Hoechst stain (Method-B, Common threshold=0.2, Area > 30 $\mu$ M, Split factor=7, individual threshold=0.5, contrast>0.1). Once nuclei were selected, the Calcein stained cytoplasm was defined in segmented cells using the CalceinAM channel (Method A, individual threshold=0.1). Calcein mean signal intensity was determined using the Calculate Intensity Properties function following selected parameters (region of interest (ROI) population: nuclei, ROI region: cytoplasm). To exclude cells that were not unstained for Calcein the select population function was used (ROI population: nuclei selected, Method: Filter by property, Filter F1: Intensity Cytoplasm CalceinAM mean>1000). The numbers of lysosome spots stained with Lysotracker Red were determined from the nuclei selected population; the number of spots were located in segmented cells using the Lysotracker channel (ROI population=nuclei selected, ROI region=cell, Method A, relative spot intensity>0.075, splitting coefficient=1, calculate spot properties). The maximum intensity of lysosome staining was calculated using the Lysotracker Red Channel (ROI population: spots, ROI region: spot maximum), using exclusion criteria to remove outliers (ROI population: spots Method: Filter by property, Filter F1: Intensity spot maximum Lysotracker Red mean <20,000, Filter F2: spot area (px<sup>2</sup>)<200). The output value for numbers of lysosome spots was divided by the numbers of nuclei to obtain the numbers of spots/cell.

#### *Hoechst/MitoTracker Green/MitoTracker Red image processing*

Image segmentation to distinguish between different cells was done using the Hoechst channel where cells were identified using their Hoechst stain (Method-B, Common threshold=0.4, Area > 30 $\mu$ M, Split factor=16.5, individual threshold=0.2, contrast>0.1; Hoechst Intensity- ROI population: nuclei, ROI region=nucleus, method- standard mean; Nuclei selected population- ROI population: nuclei, Method: Filter by property, Filter F1: intensity nucleus Hoechst <10,000 to remove outliers), Calculate Morphology Properties function (Nucleus Output= ROI population: nuclei, ROI region: nucleus, mean: standard-area roundness; Cell Output= ROI population: nuclei selected, ROI region: cell, method= standard- area roundness). Total mitochondrial intensity was determined by defining the image region (Channel: MitoTracker Green, ROI population: nuclei selected, ROI region: cell, Method: common threshold, threshold=0.35, split into objects, output population: Mitogreen, output region: mitochondria) followed by Calculate Intensity Properties function (Channel: MitoTracker Green, ROI population: Mitogreen, ROI region: mitochondria, Method-standard-mean). The intensity of active mitochondria was determined by Calculate Intensity Properties function (Channel: MitoTracker Red, ROI population: Mitogreen, ROI region: mitochondria, Method-standard-mean). Active mitochondria relative to total mitochondria were determined by dividing the MitoTracker Red Intensity with that for MitoTracker Green.

#### *Hoechst/Nile Red/CellMask DeepRed image processing*

Image segmentation to distinguish between different cells was done using the Hoechst channel where cells were identified using their Hoechst stain (Method-B, Common threshold=0.4, Area > 30 $\mu$ M, Split factor=16.5, individual threshold=0.2, contrast>0.1; Hoechst Intensity- ROI population: nuclei, ROI region=nucleus, method- standard mean; Nuclei selected population- ROI population: nuclei, Method: Filter by property, Filter F1: intensity nucleus

Hoechst <20,000 to remove outliers) and defining the cytoplasm (Channel: CellMask Deep, nuclei, Method A: individual threshold=0.05). Lipid droplets were detected using the Finding Spots function (Channel: Nile Red, ROI population: nuclei selected, ROI region: cell, Method A: relative spot intensity>0.08, splitting coefficient=1, calculate spot properties) and nuclei selection was used to determine total lipid droplet spot areas and numbers/cell.

#### *Hoechst/CellRox/Calcein image processing*

Image segmentation to distinguish between different cells was done using the Hoechst channel where cells were identified using their Hoechst stain (Method-B, Common threshold=0.2-0.4, Area > 30 $\mu$ M, Split factor=7, individual threshold=0.4, contrast>0.1; Hoechst Intensity- ROI population: nuclei, ROI region=nucleus, method- standard mean; Nuclei selected population- ROI population: nuclei, Method: Filter by property, Filter F1: intensity nucleus Hoechst <10,000 to remove outliers) and defining the cytoplasm (Channel: Calcein, ROI population: nuclei selected, Method A: individual threshold=0.15; Finding Surrounding Region for background: Channel: Calcein, ROI population: nuclei selected, ROI region: cell, Method A: individual threshold=0.15). Calculate Intensity Properties function was used to calculate both Cellrox intensity (Channel: CellRox, ROI population: nuclei selected, ROI region: cell) as well as background (Channel: CellRox, ROI population: nuclei selected, ROI region: background) to determine corrected values (Calculate Properties: ROI population: nuclei selected, Formula A-B, A=intensity of Cellrox, B=intensity background Cellrox).

Final readouts of all values from the Columbus processing and analyses system were mean values/well. Values were averaged between replicates to determine mean values/condition/experiment.

## 2. Supplementary data

**Supplementary data Table 1: Live-cell dyes used during high-content imaging analyses.**

| <b>Dye</b>           | <b>Endpoint Assessed</b>     | <b>Dilution</b> | <b>Source</b> |
|----------------------|------------------------------|-----------------|---------------|
| CalceinAM            | cell viability               | 1:1,000         | Invitrogen    |
| Hoechst 33342        | nuclear morphology           | 1:2,000         | Invitrogen    |
| MitotrackerGreen FM  | mitochondria quantification  | 1:2,000         | Invitrogen    |
| MitotrackerRedCMXRos | mitochondria activity        | 1:2,500         | Invitrogen    |
| LysotrackerDND99     | lysosome quantification      | 1:6,666         | Invitrogen    |
| Nile red             | lipid droplet quantification | 1:100           | Invitrogen    |
| CellRox Deep Red     | oxidative stress             | 1:2,500         | Invitrogen    |
| CellMask             | plasma membrane              | 1:1,000         | Invitrogen    |

**Supplementary data Table 2: High-Throughput Toxicokinetics modeling parameters.**

| Acronym <sup>1</sup> | CASRN      | Human.Clint | Human.Funbound.plasma | logP   | MW          | Css    |
|----------------------|------------|-------------|-----------------------|--------|-------------|--------|
| BPA                  | 80-05-7    | 28.61155556 | 0.0881                | 3.4237 | 228.28634   | 13.75  |
| BPAF                 | 1478-61-1  | 37.13131313 | 0.06454               | 4.5085 | 336.2291192 | 5.58   |
| BPF                  | 620-92-8   | 29.10169127 | 0.110349398           | 2.6886 | 200.2332    | 11.70  |
| BPS                  | 80-09-1    | 9.437737374 | 0.15853               | 3.0114 | 250.2704    | 126.54 |
| BPM                  | 13595-25-0 | 317.5133591 | 0.032901504           | 5.7496 | 346.462     | 4.27   |
| BPTMC                | 129188-9-4 | 119.6474045 | 0.04336738            | 5.2301 | 310.4299    | 17.81  |

<sup>1</sup>BPA, BPAF, and BPS already had data available in HTTK and therefore, no input data was required.

**Supplementary data Figure 1**

Chemical concentrations at which no cytotoxicity was observed were used for the analyses of phenotypic endpoints using BMDEExpress 2.2 (green boxes; grey boxes=significant cytotoxicity determined using Dunnett’s test with Minitab19).

|                  |       |       | Concentrations Tested (µM) |       |       |       |       |       |       |       |       |       |
|------------------|-------|-------|----------------------------|-------|-------|-------|-------|-------|-------|-------|-------|-------|
|                  |       |       | 0.001                      | 0.01  | 0.1   | 1     | 3.2/5 | 10    | 20    | 50    | 100   |       |
| Compounds Tested | BPA   | C18-4 | Green                      | Green | Green | Green | Green | Green | Green | Green | Green | Grey  |
|                  |       | MA-10 | Green                      | Green | Green | Green | Green | Green | Green | Green | Green | Grey  |
|                  |       | KGN   | Green                      | Green | Green | Green | Green | Green | Green | Green | Green | Green |
|                  | BPAF  | C18-4 | Green                      | Green | Green | Green | Green | Green | Green | Green | Green | Grey  |
|                  |       | MA-10 | Green                      | Green | Green | Green | Green | Green | Green | Green | Green | Grey  |
|                  |       | KGN   | Green                      | Green | Green | Green | Green | Green | Green | Green | Green | Grey  |
|                  | BPF   | C18-4 | Green                      | Green | Green | Green | Green | Green | Green | Green | Green | Green |
|                  |       | MA-10 | Green                      | Green | Green | Green | Green | Green | Green | Green | Green | Grey  |
|                  |       | KGN   | Green                      | Green | Green | Green | Green | Green | Green | Green | Green | Green |
|                  | BPS   | C18-4 | Green                      | Green | Green | Green | Green | Green | Green | Green | Green | Green |
|                  |       | MA-10 | Green                      | Green | Green | Green | Green | Green | Green | Green | Green | Grey  |
|                  |       | KGN   | Green                      | Green | Green | Green | Green | Green | Green | Green | Green | Green |
|                  | BPM   | C18-4 | Green                      | Green | Green | Green | Green | Green | Green | Green | Green | Grey  |
|                  |       | MA-10 | Green                      | Green | Green | Green | Green | Green | Green | Green | Green | Grey  |
|                  |       | KGN   | Green                      | Green | Green | Green | Green | Green | Green | Green | Green | Grey  |
| BPTMC            | C18-4 | Green | Green                      | Green | Green | Green | Green | Green | Green | Green | Grey  |       |
|                  | MA-10 | Green | Green                      | Green | Green | Green | Green | Green | Green | Green | Grey  |       |
|                  | KGN   | Green | Green                      | Green | Green | Green | Green | Green | Green | Green | Grey  |       |

## Supplementary data Figure 2

BMC models (significant-upregulated: yellow box, down-regulated: purple box; non-significant-grey) that were generated to observe the effects of bisphenols on various phenotypic endpoints.

|                  |       |       | Morphological Parameters |                     |                    |                     |                           |                          |                    |                  |
|------------------|-------|-------|--------------------------|---------------------|--------------------|---------------------|---------------------------|--------------------------|--------------------|------------------|
|                  |       |       | Calcein Intensity        | Number of Lysosomes | Total Mitochondria | Active Mitochondria | Active/Total Mitochondria | Number of Lipid Droplets | Lipid Droplet area | Oxidative Stress |
| Compounds Tested | BPA   | C18-4 |                          |                     |                    |                     |                           |                          |                    |                  |
|                  |       | MA-10 |                          |                     |                    |                     |                           |                          |                    |                  |
|                  |       | KGN   |                          |                     |                    |                     |                           |                          |                    |                  |
|                  | BPAF  | C18-4 |                          |                     |                    |                     |                           |                          |                    |                  |
|                  |       | MA-10 |                          |                     |                    |                     |                           |                          |                    |                  |
|                  |       | KGN   |                          |                     |                    |                     |                           |                          |                    |                  |
|                  | BPF   | C18-4 |                          |                     |                    |                     |                           |                          |                    |                  |
|                  |       | MA-10 |                          |                     |                    |                     |                           |                          |                    |                  |
|                  |       | KGN   |                          |                     |                    |                     |                           |                          |                    |                  |
|                  | BPS   | C18-4 |                          |                     |                    |                     |                           |                          |                    |                  |
|                  |       | MA-10 |                          |                     |                    |                     |                           |                          |                    |                  |
|                  |       | KGN   |                          |                     |                    |                     |                           |                          |                    |                  |
|                  | BPM   | C18-4 |                          |                     |                    |                     |                           |                          |                    |                  |
|                  |       | MA-10 |                          |                     |                    |                     |                           |                          |                    |                  |
|                  |       | KGN   |                          |                     |                    |                     |                           |                          |                    |                  |
| BPTMC            | C18-4 |       |                          |                     |                    |                     |                           |                          |                    |                  |
|                  | MA-10 |       |                          |                     |                    |                     |                           |                          |                    |                  |
|                  | KGN   |       |                          |                     |                    |                     |                           |                          |                    |                  |



### Supplementary data Figure 3

Comparison of bisphenol analog cell viability data from the literature (circles) with the BMC values reported here for C18-4, MA-10 and KGN cells (triangles). The y-axis depicts the lowest concentrations at which decreases were observed.

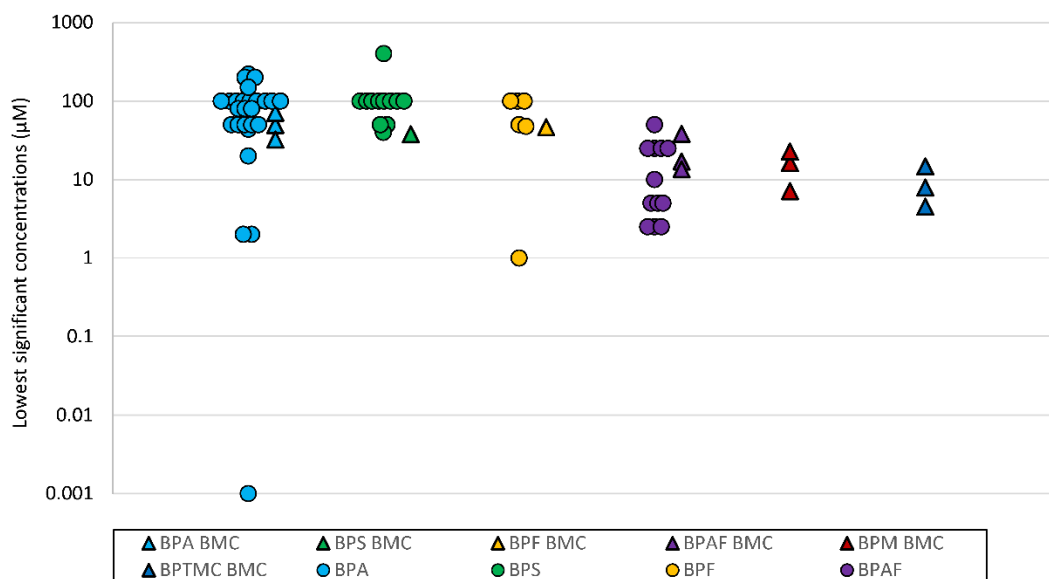

References for the data presented in Supplementary data Fig. 3:

Huang, M., Liu, S., Fu, L., Jiang, X. & Yang, M. (2020). Bisphenol A and its analogues bisphenol S, bisphenol F and bisphenol AF induce oxidative stress and biomacromolecular damage in human granulosa KGN cells. *Chemosphere* **253**, 126707.

Jambor, T., Kovacikova, E., Greifova, H., Kovacik, A., Libova, L., Lukac, N. (2019). Assessment of the effective impact of bisphenols on mitochondrial activity and steroidogenesis in a dose-dependency in mice TM3 Leydig cells. *Physiol Res* **68**, 689–693.

- Jiang, X., Yin, L., Zhang, N., Han, F., Liu, W. B., Zhang, X., Chen, H. Q., Cao, J., Liu, J. Y. (2018). Bisphenol A induced male germ cell apoptosis via IFN $\beta$ -XAF1-XIAP pathway in adult mice. *Toxicol. Appl. Pharmacol.* **355**, 247–256.
- Kose, O., Rachidi, W., Beal, D., Erkekoglu, P., Fayyad-Kazan, H., Gumusel, B. K. (2020). The effects of different bisphenol derivatives on oxidative stress, DNA damage and DNA repair in RWPE-1 cells: A comparative study. *Journal of Applied Toxicology* **40**, 643–654.
- Liang, S., Yin, L., Yu, K.S., Hofmann, M.C., Yu, X. (2017). High-content analysis provides mechanistic insights into the testicular toxicity of Bisphenol A and selected analogues in mouse spermatogonial cells. *Toxicol. Sci.* **155**, 43–60.
- Qi, S., Fu, W., Wang, C., Liu, C., Quan, C., Kourouma, A., Yan, M., Yu, T., Duan, P., Yang, K. (2014). BPA-induced apoptosis of rat Sertoli cells through Fas/FasL and JNKs/p38 MAPK pathways. *Reprod. Toxicol.* **50**, 108–116.
- Qian, W., Zhu, J., Mao, C., Liu, J., Wang, Y., Wang, Q., Liu, Y., Gao, R., Xiao, H., Wang, J. (2014). Involvement of CaM-CaMKII-ERK in bisphenol A-induced Sertoli cell apoptosis. *Toxicology* **324**, 27-34.
- Sidorkiewicz, I., Czerniecki, J., Jarzabek, K., Zbucka-Krętownska, M., Wołczyński, S. (2018). Cellular, transcriptomic and methylome effects of individual and combined exposure to BPA, BPF, BPS on mouse spermatocyte GC-2 cell line. *Toxicology and Applied Pharmacology* **359**, 1–11.
- Téteau, O., Jaubert, M., Desmarchais, A., Papillier, P., Binet, A., Maillard, V., Elis, S. (2020). Bisphenol A and S impaired ovine granulosa cell steroidogenesis. *Reproduction* **159**, 571–583.
- Wang, C., Fu, W., Quan, C., Yan, M., Liu, C., Qi, S., Yang, K. (2015). The role of Pten/Akt signaling pathway involved in BPA-induced apoptosis of rat sertoli cells. *Environmental toxicology* **30**, 793-802.
- Xin, L., Lin, Y., Wang, A., Zhu, W., Liang, Y., Su, X., Hong, C., Wan, J., Wang, Y., Tian, H. (2015). Cytogenetic evaluation for the genotoxicity of bisphenol-A in Chinese hamster ovary cells. *Environmental toxicology and pharmacology* **40**, 524-529.
- Yin, N., Liang, X., Liang, S., Liang, S., Yang, R., Hu, B., Cheng, Z., Liu, S., Dong, H., Liu, S., Faiola, F. (2019). Embryonic stem cell-and transcriptomics-based in vitro analyses reveal that bisphenols A, F and S have similar and very complex potential developmental toxicities. *Ecotoxicology and environmental safety* **176**, 330-338.
- Zhu, X., Tian, G.G., Yu, B., Yang, Y., Wu, J. (2018). Effects of bisphenol A on ovarian follicular development and female germline stem cells. *Archives of toxicology* **92**, 1581-1591.
